# Supplementary material for: Mitochondrial thermo-sensitivity in invasive and native freshwater mussels
Source: Oxford University Press journal article supplement (doi:10.1242/jeb.215921), 2020-01-01
Supplement: jeb215921supp.pdf [file jeb215921supp.pdf]

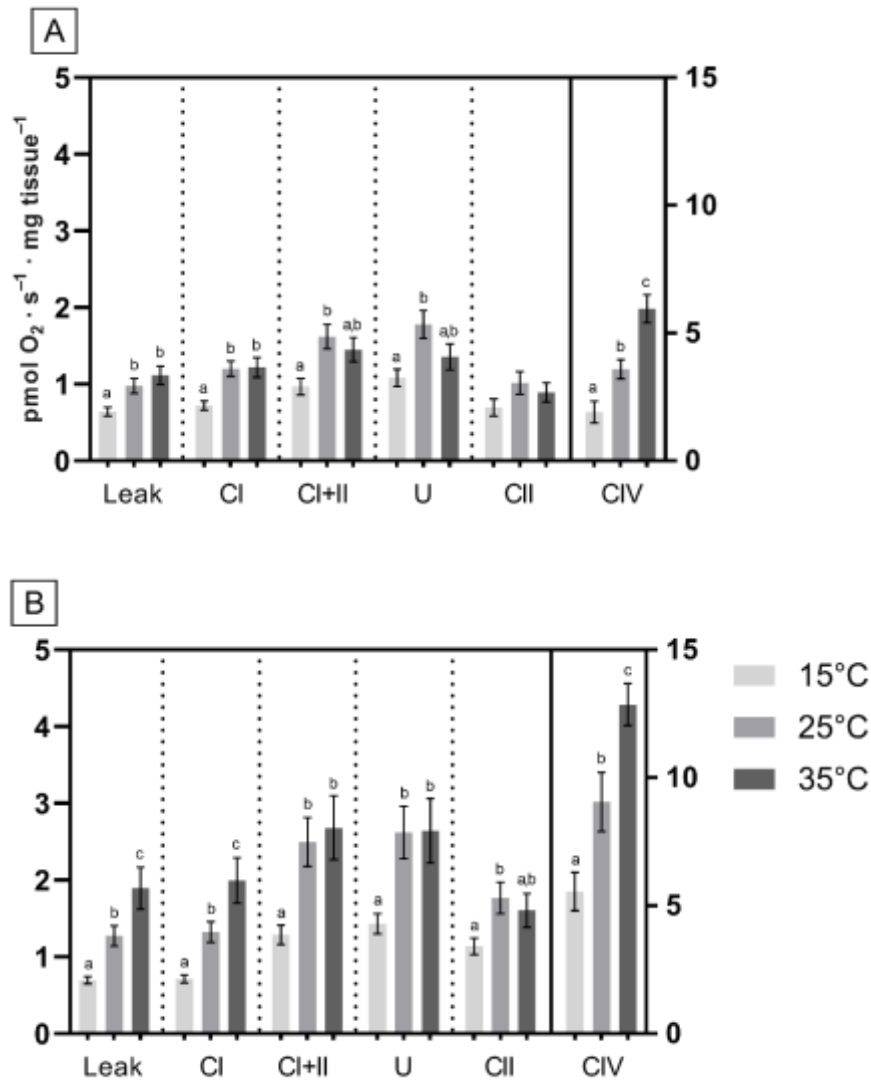

**Figure s1.** Mitochondrial respiratory capacity measured in permeabilized gills at three different temperatures in *Dreissena bugensis* (A) and *Elliptio complanata* (B). Data, normalized for mg of tissue, are means  $\pm$  SEM ( $n = 9$  for *D. bugensis*,  $n = 12$  for *E. complanata*). Respiratory parameters: **Leak**, presence of CI-linked substrates without ADP; **CI**, presence of CI-linked substrates with ADP; **CI+II**, presence of CI/CII-linked substrates with ADP; **U**, presence of CI/CII-linked substrates with ADP and added uncoupler (FCCP); **CII**, presence of CI/CII-linked substrates with ADP and added uncoupler (FCCP) as well as CI-linked inhibitor; **CIV**, presence of CI/CIII-linked inhibitors with Ascorbate/TMPD for sustained activity. Significance was set as  $P \leq 0.05$ ; letters denote differences between temperatures within a parameter with **a** statistically significant from **b** & **c** and **b** statistically different from **a** & **c**. All parameters are associated with the left y axis except for CIV which is associated with the right y axis.

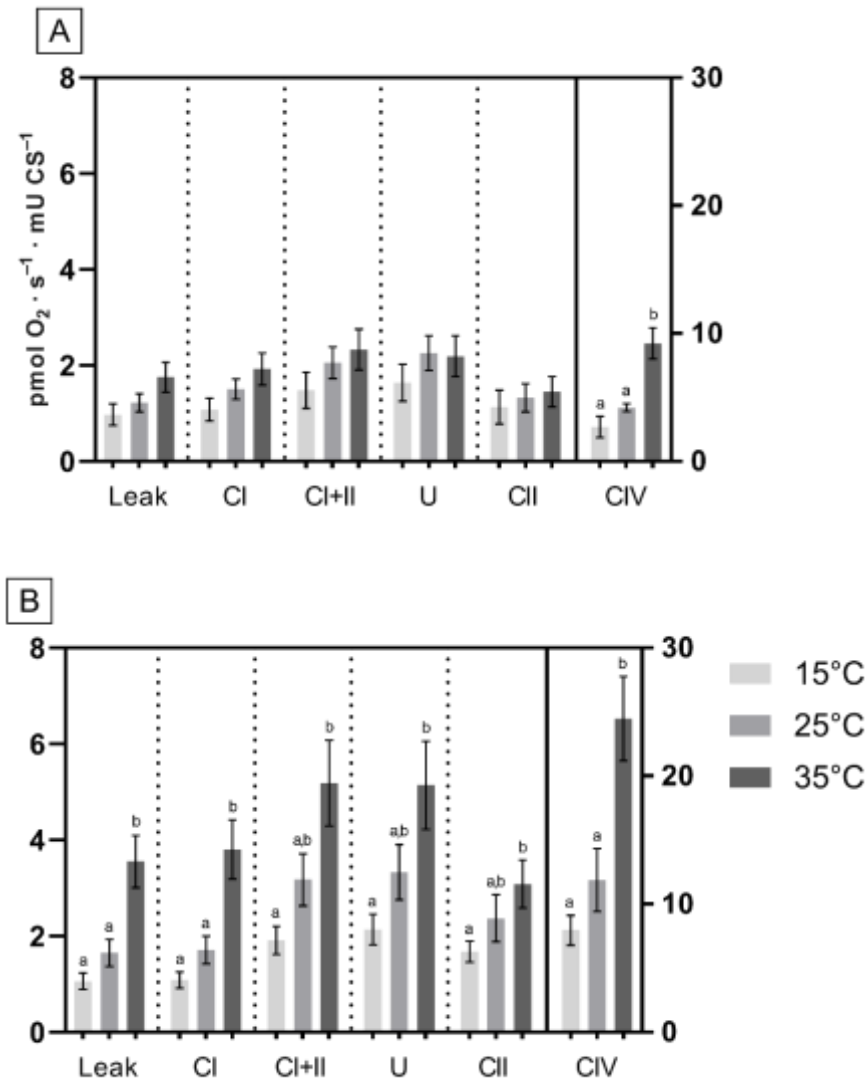

**Figure s2.** Mitochondrial respiratory capacity measured in permeabilized gills at three different temperatures in *Dreissena bugensis* (A) and *Elliptio complanata* (B). Data, normalized for mIU of citrate synthase, are means  $\pm$  SEM ( $n = 9$  for *D. bugensis*,  $n = 12$  for *E. complanata*). Respiratory parameters: **Leak**, presence of CI-linked substrates without ADP; **CI**, presence of CI-linked substrates with ADP; **CI+II**, presence of CI/CII-linked substrates with ADP; **U**, presence of CI/CII-linked substrates with ADP and added uncoupler (FCCP); **CII**, presence of CI/CII-linked substrates with ADP and added uncoupler (FCCP) as well as CI-linked inhibitor; **CIV**, presence of CI/CIII-linked inhibitors with Ascorbate/TMPD for sustained activity. Significance was set as  $P \leq 0.05$ ; letters denote differences between temperatures within a parameter with **a** statistically significant from **b**. All parameters are associated with the left y axis except for CIV which is associated with the right y axis.

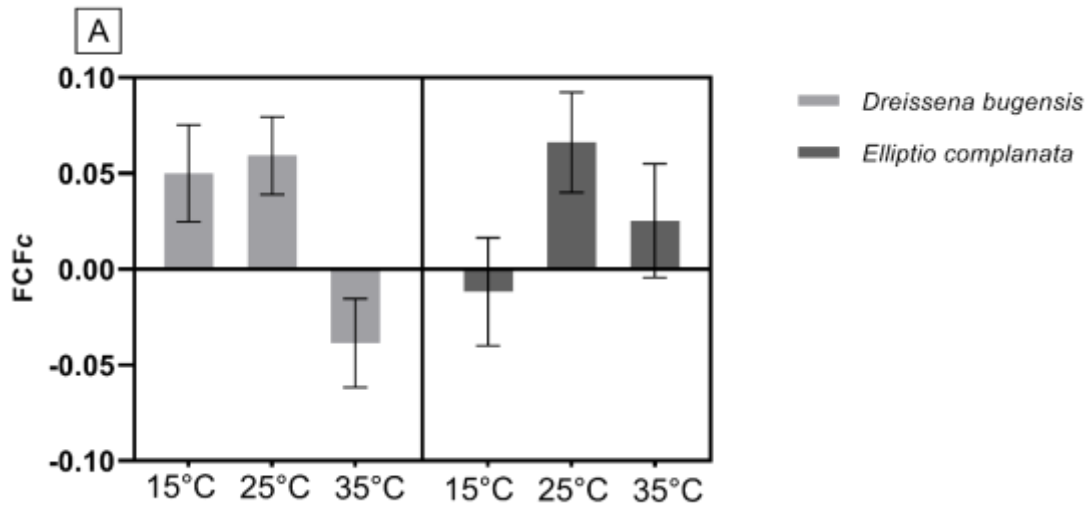

**Figure s3.** Integrity of the mitochondrial outer membrane (A) calculated as the flux control factor for cytochrome *c* (FCFc) ascertained from respiratory values in the presence of complex I substrates; 0 indicates full integrity of the outer mitochondrial membrane and 1 indicates a fully damaged outer mitochondrial membrane ( $FCFc = (CI_c - CI) \cdot CI_c^{-1}$ ). Data are means  $\pm$  SEM ( $n = 9$  for *D. bugensis*,  $n = 12$  for *E. complanata*). Significance was set as  $P \leq 0.05$ .
